# Supplementary material for: Enhanced thermal stability of polystyrene by graphitic carbon nitride/spinel ZnCo2O4 nanohybrids and the catalytic mechanism investigation
Source: Royal Society of Chemistry journal article supplement (doi:10.1039/c5ra02787j), 2015-01-01
Supplement: c5ra02787j1.pdf [file c5ra02787j1.pdf]

## **Enhanced thermal stability of polystyrene by graphitic carbon nitride/spinel $\text{ZnCo}_2\text{O}_4$ nanohybrids and the catalytic mechanism investigation**

Yongqian Shi <sup>ab</sup>, Yulu Zhu <sup>a</sup>, Bin Yu <sup>ab</sup>, Richard K.K Yuen <sup>b</sup>, Zhou Gui <sup>a\*</sup>,  
Hui Liu <sup>c</sup>, Yuan Hu <sup>a\*</sup>

<sup>a</sup> State Key Laboratory of Fire Science, University of Science and Technology of China, 96 Jinzhai Road, Hefei, Anhui 230026, P. R. China

<sup>b</sup> Department of Architecture and Civil Engineering, City University of Hong Kong, Tat Chee Avenue, Kowloon, Hong Kong

<sup>c</sup> Nano Science and Technology Institute, University of Science and Technology of China, 166 Ren'ai Road, Suzhou, Jiangsu 215123, P. R. China

\* To whom correspondence should be addressed.

Tel.: +86-551-3601288; fax: +86-551-3601669. E-mail address: [zgui@ustc.edu.cn](mailto:zgui@ustc.edu.cn) (Z. Gui) and

Tel.: +86-551-3601664; fax: +86-551-3601664. E-mail address: [yuanhu@ustc.edu.cn](mailto:yuanhu@ustc.edu.cn) (Y. Hu).

## **2. Experimental section**

### **2.1. Raw materials**

PS (158 K) was obtained from BASF-YPC Co., Ltd. (China). Cobaltous acetate tetrahydrate ( $\text{Co}(\text{OAc})_2 \cdot 4\text{H}_2\text{O}$ ), Zinc nitrate hexahydrate ( $\text{Zn}(\text{NO}_3)_2 \cdot 4\text{H}_2\text{O}$ ), urea, and anhydrous ethanol were purchased from Sinopharm Chemical Reagent Co., Ltd. (Shanghai, China). Ammonium hydroxide ( $\text{NH}_3 \cdot \text{H}_2\text{O}$ ) was provided by Shanghai Pilot Chemical Co., Ltd. (Shanghai, China). All reagents were used as received without further purification.

### **2.2. Preparation of $\text{ZnCo}_2\text{O}_4/\text{g-C}_3\text{N}_4$ nanohybrids**

The bulk  $\text{g-C}_3\text{N}_4$  was synthesized according to our previous work.<sup>1</sup> The C- $\text{ZnCo}_2\text{O}_4$  nanohybrids were prepared by conventional solvothermal method. In a typical procedure, 0.23 g of as-synthesized  $\text{g-C}_3\text{N}_4$  was dispersed in 60 mL of anhydrous ethanol under ultrasonication. After sonication for 2 h, 12 mL of 0.1 M  $\text{Co}(\text{OAc})_2$  and 6.25 mL of 0.1 M  $\text{Zn}(\text{NO}_3)_2$  were introduced into the suspension above, followed by the addition of 1.75 mL of  $\text{NH}_3 \cdot \text{H}_2\text{O}$  at room temperature with further stirring for 10 h. Then the reaction mixture was transferred to a 100 mL of Teflon-lined autoclave and heated at 150 °C for 10 h. The resulting product was collected by centrifugation and washed with ethanol, and dried at 80 °C. The resulting nanohybrid was collected and labeled as C- $\text{ZnCo}_2\text{O}_4$ . For comparison, free  $\text{ZnCo}_2\text{O}_4$  nanoparticles were synthesized by the same strategy as C- $\text{ZnCo}_2\text{O}_4$  except for adding  $\text{g-C}_3\text{N}_4$ .

### **2.3. Preparation of PS composites**

PS composites were prepared by mixing PS matrix with C- $\text{ZnCo}_2\text{O}_4$  nanohybrids (2 wt% in this work) in a Brabender-like apparatus (LH-60, afforded by Shanghai Kechuang Plastic Machinery Co., Ltd., China) with a roller speed of 60 r/min at 180 °C for 15 min. The resulting composites were hot-pressed into sheets for characterization. Both of PS/ $\text{g-C}_3\text{N}_4$  and PS/ $\text{ZnCo}_2\text{O}_4$  composites were prepared in a similar procedure.

### **2.4. Characterization**

Powder X-ray diffraction (XRD) patterns were performed with a Japan Rigaku Dmax

X-ray diffractometer equipped with graphite monochromatized high-intensity Cu-K $\alpha$  radiation ( $\lambda= 1.54178 \text{ \AA}$ ). Transmission electron microscopy (TEM) was provided by JEOL 2010F with an acceleration voltage of 200 kV. XPS spectra were recorded using a Kratos Axis Ultra DLD spectrometer employing a monochromatic Al K $\alpha$  X-ray source ( $h\nu= 1486.6 \text{ eV}$ ). The morphologies of the fracture surface of PS composites were investigated by SEM (AMRAY1000B, Beijing R&D Center of the Chinese Academy of Sciences, China). These samples were fractured in liquid nitrogen and sputter coated with a gold layer before observation. Thermogravimetric analysis (TGA) of the obtained samples was carried out with Q5000 thermal analyzer (TA Co., USA) from 30 °C to 800 °C at a heating rate of 20 °C min<sup>-1</sup> in air atmosphere (flow rate of 100 mL min<sup>-1</sup>).

## References

1. Y. Shi, S. Jiang, K. Zhou, B. Wang, B. Wang, Z. Gui, Y. Hu and R. K. K. Yuen, *RSC Adv.*, 2014, **4**, 2609-2613.
